# Supplementary material
Source: PubMed Central journal article supplement (PMC3534466)
Supplement: supp_amiajnl-2012-000881_amiajnl-2012-000881-s4.pdf [file supp_amiajnl-2012-000881_amiajnl-2012-000881-s4.pdf]

Supplementary Figure 1: Components (shown as rectangles) and subcomponents (shown as rounded rectangles) of the Vaccine adverse event Text Mining system. Also, the resources (shown as parallelograms) used for the creation of VAERS dictionary and the processing flow are illustrated. SNOMED CT: Systematized Nomenclature of Medicine Clinical Terms; MedDRA: Medical Dictionary for Regulatory Activities; CDC: Centers for Disease Control and Prevention; R-b Parser: Rule-based Parser.
