# Supplementary material
Source: PubMed Central journal article supplement (PMC3534466)
Supplement: supp_amiajnl-2012-000881_amiajnl-2012-000881-s5.pdf [file supp_amiajnl-2012-000881_amiajnl-2012-000881-s5.pdf]

Supplementary Table 1: Terms that were included in VAERS dictionary and were tagged as time modifiers and time units; others represented the concepts of negation and second level diagnosis (subdivided into certainty, possibility and impression).

| Time Modifiers | Time Units <sup>i</sup> | Negation | 2 <sup>nd</sup> level diagnosis |                          |                         |
|----------------|-------------------------|----------|---------------------------------|--------------------------|-------------------------|
|                |                         |          | Certainty <sup>i</sup>          | Possibility <sup>i</sup> | Impression <sup>i</sup> |
| ago            | minute.*                | non      | unk.*                           | possib.*                 | experienc.*             |
| before         | hour.*                  | no       | undetermined                    | probab.*                 | suffer.*                |
| post           | day.*                   | not      | unexplained                     | question.*               | develop.*               |
| within         | week.*                  | denies   | natural                         | unconfirm.*              | impress.*               |
| wi             | month.*                 | denied   | nos                             | pending.*                | assess.*                |
| p              | year.*                  | without  |                                 | suspect.*                |                         |
| following      | hrs                     | wo       |                                 | unsure.*                 |                         |
| later          | min                     | any      |                                 | unspecif.*               |                         |
| after          | mins                    | none     |                                 |                          |                         |
| for            | hr                      | negative |                                 |                          |                         |
|                | second.*                | neg      |                                 |                          |                         |
|                | wks                     | wouldnt  |                                 |                          |                         |
|                | wk                      | couldnt  |                                 |                          |                         |
|                | evening                 | shouldnt |                                 |                          |                         |
|                | morning                 | wont     |                                 |                          |                         |
|                | noon                    | cannot   |                                 |                          |                         |
|                | afternoon               | gone     |                                 |                          |                         |
|                | midnight                |          |                                 |                          |                         |

<sup>i</sup> wildcard characters “.\*” were used in only a few cases.

Supplementary Table 2: Counts for all types of matches between *Vae*TM and reference standard.

|                            | Features                      |  | SYMPTOM | DIAGNOSIS | TIME_TO_ONSET | VACCINE | LOT_NUMBER | CAUSE_OF_DEATH | 2nd LEVEL DIAGNOSIS | RULE_OUT_DIAGNOSIS | DRUG | FAMILY_HISTORY | MEDICAL_HISTORY |
|----------------------------|-------------------------------|--|---------|-----------|---------------|---------|------------|----------------|---------------------|--------------------|------|----------------|-----------------|
|                            | Counts                        |  |         |           |               |         |            |                |                     |                    |      |                |                 |
| 1 <sup>st</sup> Evaluation | Full-Matches                  |  | 600     | 68        | 29            | 71      | 9          | 2              | 63                  | 3                  | 229  | 1              | 8               |
|                            | Conceptual-Matches            |  | 507     | 41        | 1             | 22      | 0          | 2              | 35                  | 3                  | 16   | 0              | 15              |
|                            | Non-matches (1) <sup>i</sup>  |  | 773     | 71        | 13            | 40      | 4          | 2              | 87                  | 0                  | 69   | 1              | 23              |
|                            | Non-matches (2) <sup>ii</sup> |  | 204     | 3         | 1             | 15      | 0          | 0              | 2                   | 1                  | 26   | 0              | 6               |
| 2 <sup>nd</sup> Evaluation | Full-Matches                  |  | 568     | 148       | 2             | 73      | 4          | 6              | 82                  | 2                  | 171  | 0              | 3               |
|                            | Conceptual-Matches            |  | 419     | 60        | 9             | 21      | 8          | 2              | 70                  | 0                  | 27   | 0              | 8               |
|                            | Non-matches (1) <sup>i</sup>  |  | 339     | 45        | 10            | 20      | 5          | 6              | 108                 | 0                  | 55   | 2              | 24              |
|                            | Non-matches (2) <sup>ii</sup> |  | 187     | 29        | 1             | 18      | 0          | 1              | 13                  | 0                  | 17   | 0              | 0               |
| 3 <sup>rd</sup> Evaluation | Full-Matches                  |  | 231     | 39        | 70            | 222     | 28         | 1              | 159                 | 0                  | 157  | 2              | 75              |
|                            | Conceptual-Matches            |  | 266     | 22        | 30            | 60      | 36         | 0              | 96                  | 2                  | 25   | 2              | 51              |
|                            | Non-matches (1) <sup>i</sup>  |  | 218     | 10        | 52            | 66      | 8          | 2              | 80                  | 3                  | 37   | 6              | 118             |
|                            | Non-matches (2) <sup>ii</sup> |  | 257     | 4         | 3             | 15      | 4          | 0              | 34                  | 4                  | 23   | 0              | 6               |

<sup>i</sup> either no agreement between *Vae*TM and reference standard or *Vae*TM did not extract any text

<sup>ii</sup> *Vae*TM extracted a non-existing feature



|                                  |                                         |                               |     |    |    |     |    |   |     |   |     |   |     |
|----------------------------------|-----------------------------------------|-------------------------------|-----|----|----|-----|----|---|-----|---|-----|---|-----|
| <b>3<sup>rd</sup> Evaluation</b> | <b>CA vs PA<sub>1</sub><sup>i</sup></b> | <i>Matched_ annotations</i>   | 10  | 26 | 69 | 164 | 44 | 0 | 150 | 3 | 103 | 5 | 133 |
|                                  |                                         | <i>Missed_ annotations</i>    | 42  | 7  | 2  | 3   | 0  | 0 | 7   | 0 | 9   | 0 | 2   |
|                                  |                                         | <i>Incorrect_ annotations</i> | 18  | 0  | 7  | 0   | 3  | 0 | 12  | 0 | 14  | 0 | 42  |
|                                  | <b>CA vs PA<sub>2</sub><sup>i</sup></b> | <i>Matched_ annotations</i>   | 347 | 31 | 81 | 181 | 28 | 3 | 162 | 2 | 104 | 5 | 99  |
|                                  |                                         | <i>Missed_ annotations</i>    | 3   | 7  | 0  | 0   | 0  | 0 | 16  | 0 | 3   | 0 | 10  |
|                                  |                                         | <i>Incorrect_ annotations</i> | 30  | 2  | 0  | 1   | 2  | 0 | 10  | 0 | 0   | 3 | 2   |

<sup>i</sup>CA: Consensus Annotator; PA: Primary Annotator.

Supplementary Table 4: Examples of differences between *Vae*TM and reference standard (first evaluation). The extracted span of text is followed by the feature name in brackets; the type of difference is also included per example, while ‘Not extracted’ means that *Vae*TM did not extract anything.

| Sentence <sup>i</sup>                                                                                                    | Reference Standard <sup>i</sup>                                                      | <i>Vae</i> TM <sup>ii</sup>                                | Type of difference            |
|--------------------------------------------------------------------------------------------------------------------------|--------------------------------------------------------------------------------------|------------------------------------------------------------|-------------------------------|
| Pt had no further problems after being treated for the second time                                                       | no further problems<br>[SYMPTOM]                                                     | <i>Not extracted</i>                                       | Occurrence                    |
| after receiving the Herpes Zoster vaccine, pt began experiencing hand itching                                            | Herpes Zoster vaccine<br>[VACCINE], itching<br>[SYMPTOM]                             | <i>Not extracted</i>                                       | Occurrence                    |
| Dx: 1) smallpox vaccination reaction                                                                                     | smallpox vaccination<br>reaction [DIAGNOSIS]                                         | <i>Not extracted</i>                                       |                               |
| Tx't: IVIG, steroids, w/ no noticeable improvement                                                                       | IVIG [DRUG], steroids<br>[DRUG]                                                      | steroids [DRUG]                                            | Occurrence                    |
| Treated with IV Benadryl, Decadron, and Famotidine and then epinepherine                                                 | IV Benadryl [DRUG],<br>Decadron [DRUG],<br>Famotidine [DRUG],<br>epinepherine [DRUG] | benadryl [DRUG],<br>decadron [DRUG],<br>famotidine [DRUG]  | Textual extent,<br>Occurrence |
| The patient does not drink alcohol                                                                                       | no alcohol<br>[MEDICAL_HISTORY]                                                      | alcohol [DRUG]                                             | Typing                        |
| She was followed for prenatal care and diagnosed with mild pregnancy-induced hypertension, for which she was not treated | pregnancy-induced<br>hypertension<br>[DIAGNOSIS]                                     | diagnosed mild<br>pregnancy<br>hypertension<br>[DIAGNOSIS] | Granularity                   |
| DIAGNOSIS OF SARCOID                                                                                                     | SARCOID                                                                              | diagnosis sarcoid                                          | Term decomposition;           |

|                                                                         |                                                                                                        |                                                           |                                   |
|-------------------------------------------------------------------------|--------------------------------------------------------------------------------------------------------|-----------------------------------------------------------|-----------------------------------|
| AND POSTERIOR<br>VITREOUS<br>DETACHMENT WITH<br>DAMAGE TO THE<br>RETINA | [DIAGNOSIS],<br>POSTERIOR<br>VITREOUS<br>DETACHMENT<br>[DIAGNOSIS],<br>DAMAGE TO RETINA<br>[DIAGNOSIS] | posterior vitreous<br>detachment<br>[DIAGNOSIS]           | occurrence                        |
| Presents to ER with c/o<br>allergic reaction to<br>pneumonia vaccine    | allergic reaction<br>[SYMPTOM], pneumonia<br>vaccine [VACCINE]                                         | allergic reaction<br>[SYMPTOM],<br>pneumonia<br>[SYMPTOM] | Term ambiguity                    |
| Ringling and ache in R ear                                              | Ringling [SYMPTOM],<br>ache in R ear<br>[SYMPTOM]                                                      | ache ear<br>[SYMPTOM]                                     | Locus modification;<br>occurrence |
| The patient had no further<br>seizures and was discharged<br>home       | no further seizures<br>[SYMPTOM]                                                                       | no seizures<br>[SYMPTOM]                                  | Textual extent                    |

<sup>i</sup> span of text as in the original report without any normalization

<sup>ii</sup> span of text as normalized by *VaeTM*
