# Supplementary material
Source: PubMed Central journal article supplement (PMC3534466)

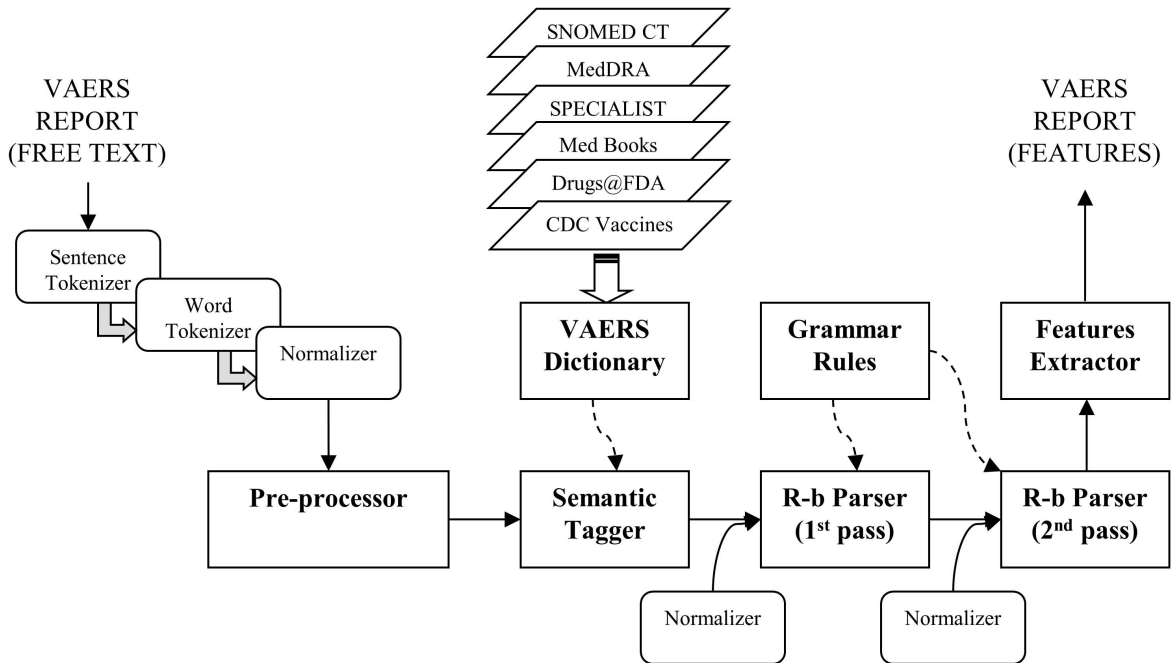

Supplement: supp_amiajnl-2012-000881_amiajnl-2012-000881-s3.pdf [file supp_amiajnl-2012-000881_amiajnl-2012-000881-s3.pdf]
